# Supplementary material
Source: ML conference proceedings conference paper supplement (https://openreview.net/forum?id=a9HOg4f9Gh)

# DRKPV - Outcome Bridge is Misspecified ( $\sigma^2 = 0.2$ )

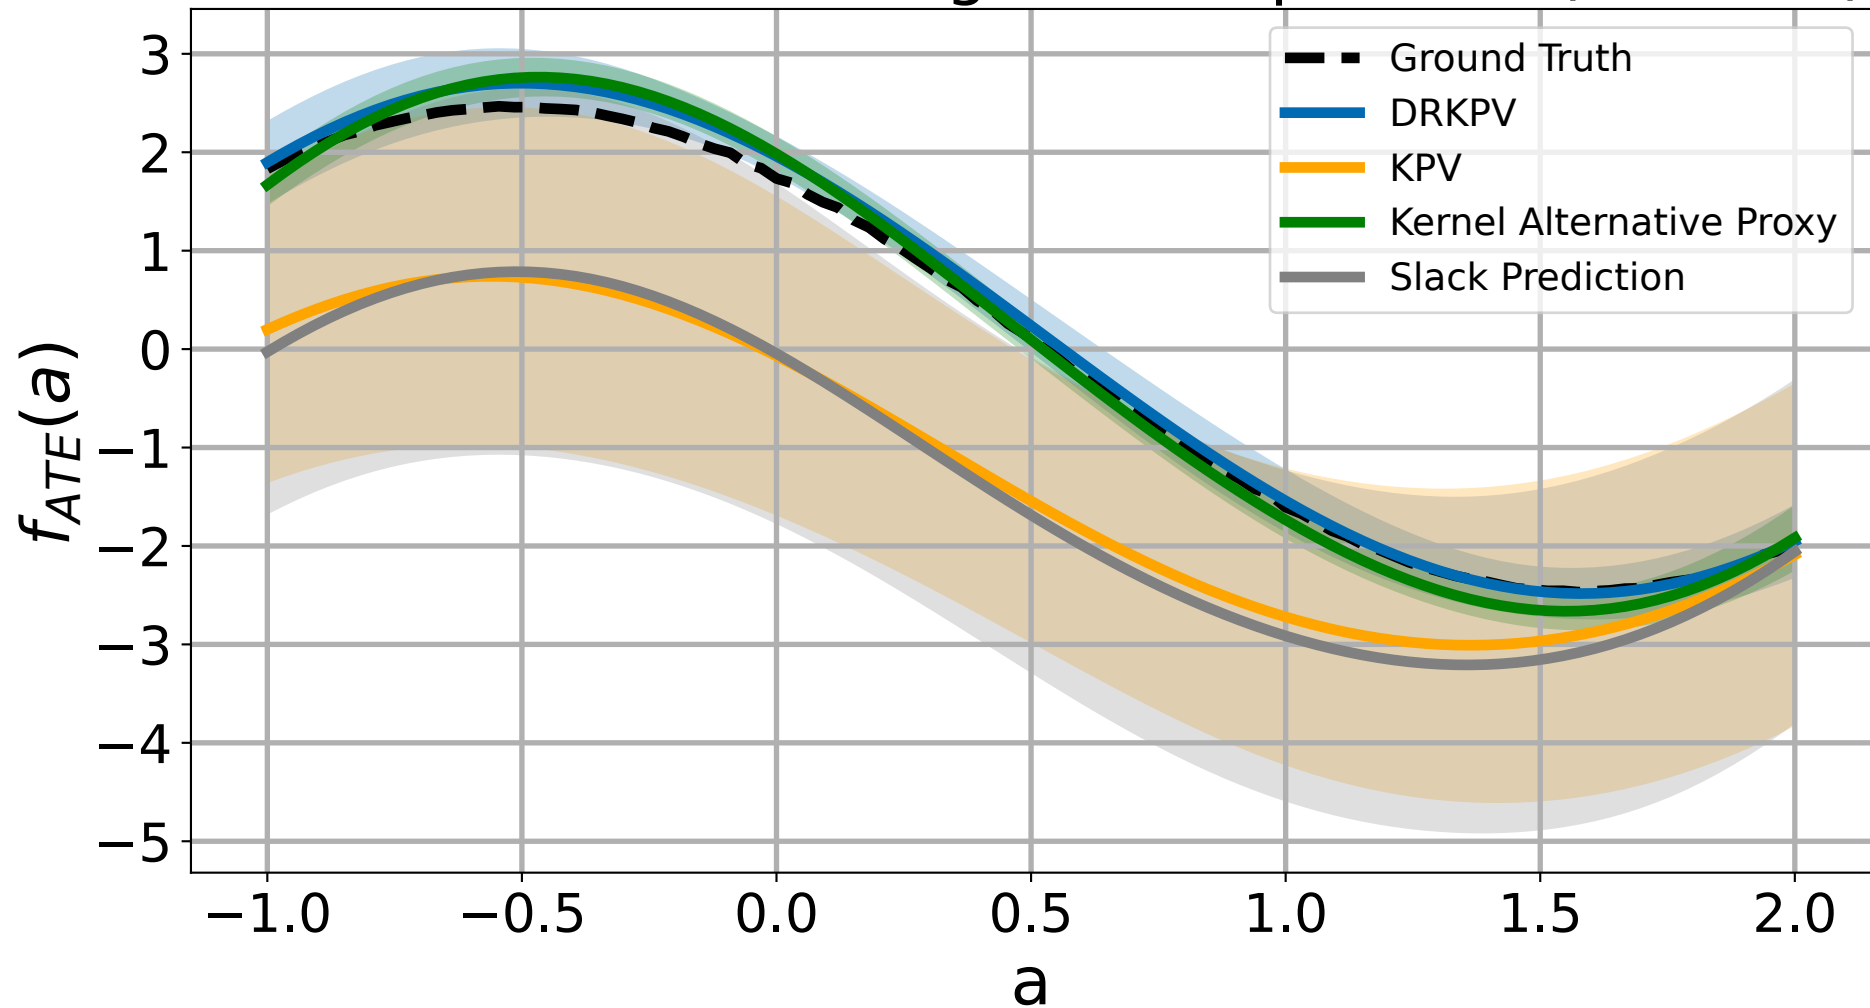

Supplement: supplementary_material [file DRKPV_ATE_OutcomeBridge_Misspecified_V1.pdf › DoublyRobustKernelProxy_Supplementary/Codes/Simulations/AnalyzeSimulationResults/Figures/DRKPV_ATE_OutcomeBridge_Misspecified_V1.pdf]

# DRKPV - Outcome Bridge is Misspecified ( $\sigma^2 = 0.5$ )

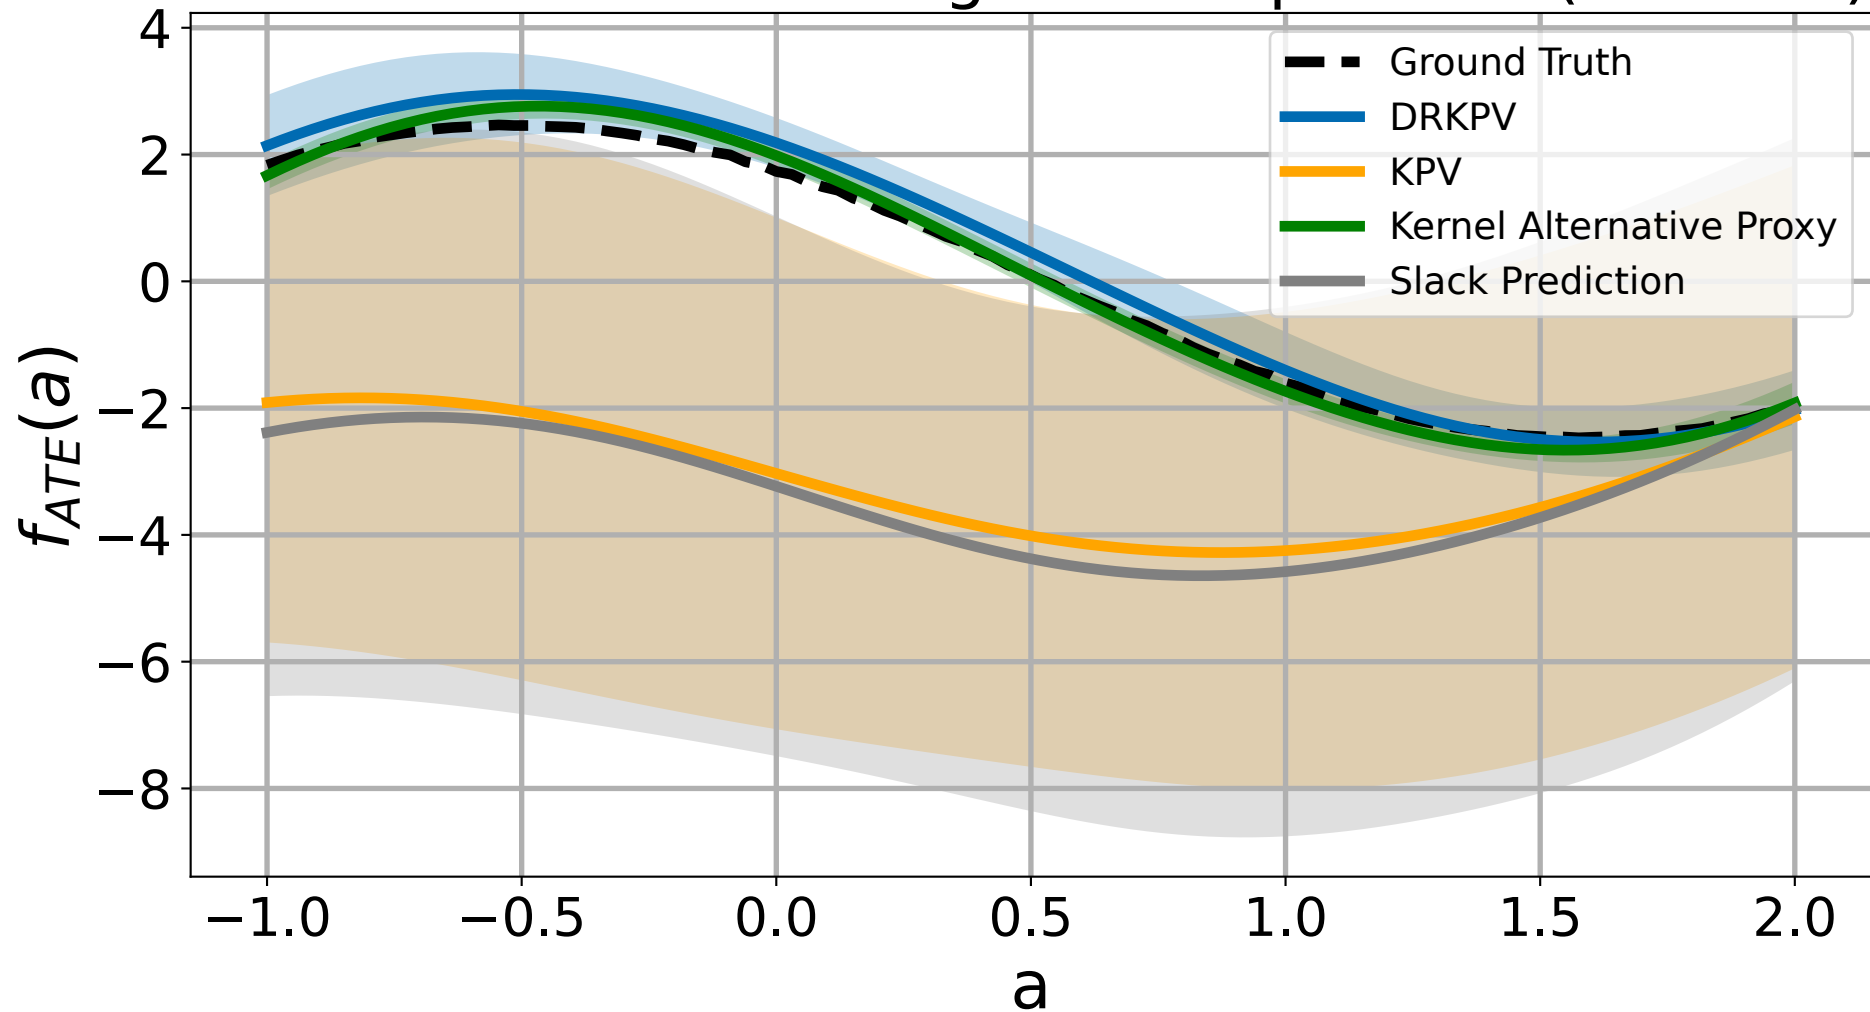

Supplement: supplementary_material [file DRKPV_ATE_OutcomeBridge_Misspecified_V2.pdf › DoublyRobustKernelProxy_Supplementary/Codes/Simulations/AnalyzeSimulationResults/Figures/DRKPV_ATE_OutcomeBridge_Misspecified_V2.pdf]

# DRKPV - Treatment Bridge is Misspecified ( $\sigma^2 = 0.2$ )

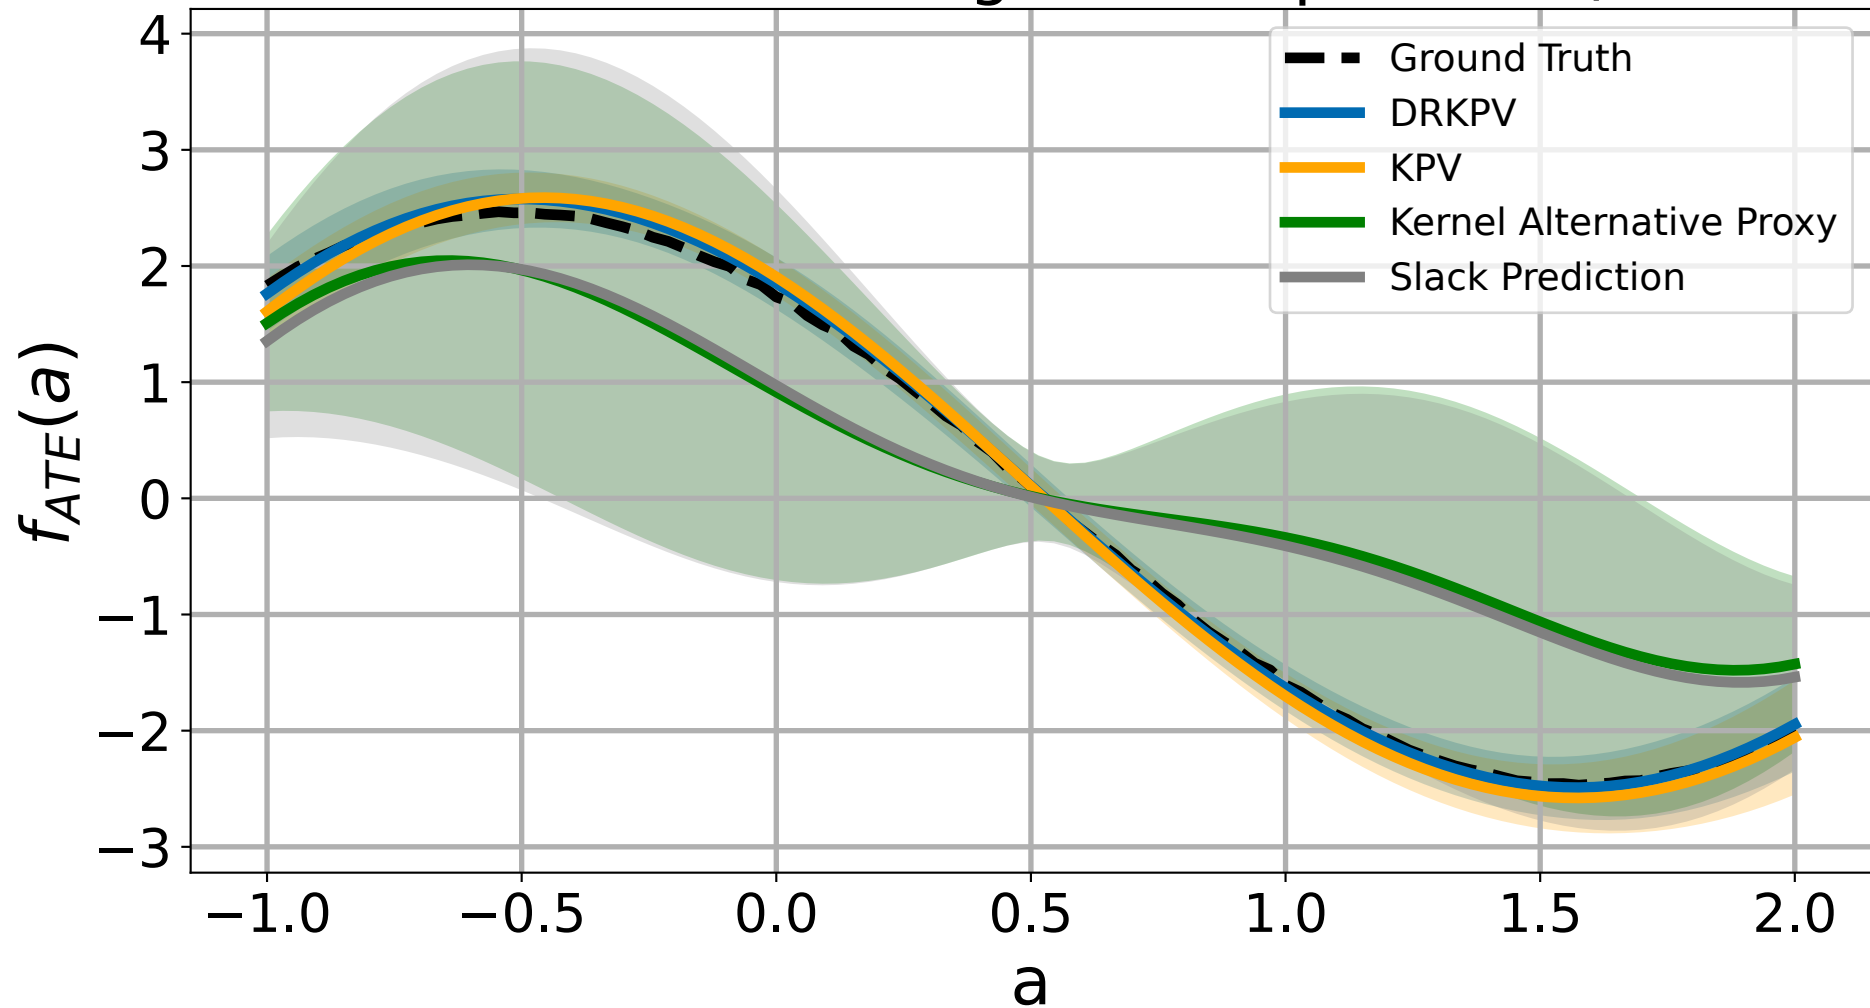

Supplement: supplementary_material [file DRKPV_ATE_TreatmentBridge_Misspecified_V1.pdf › DoublyRobustKernelProxy_Supplementary/Codes/Simulations/AnalyzeSimulationResults/Figures/DRKPV_ATE_TreatmentBridge_Misspecified_V1.pdf]

# DRKPV - Treatment Bridge is Misspecified ( $\sigma^2 = 0.5$ )

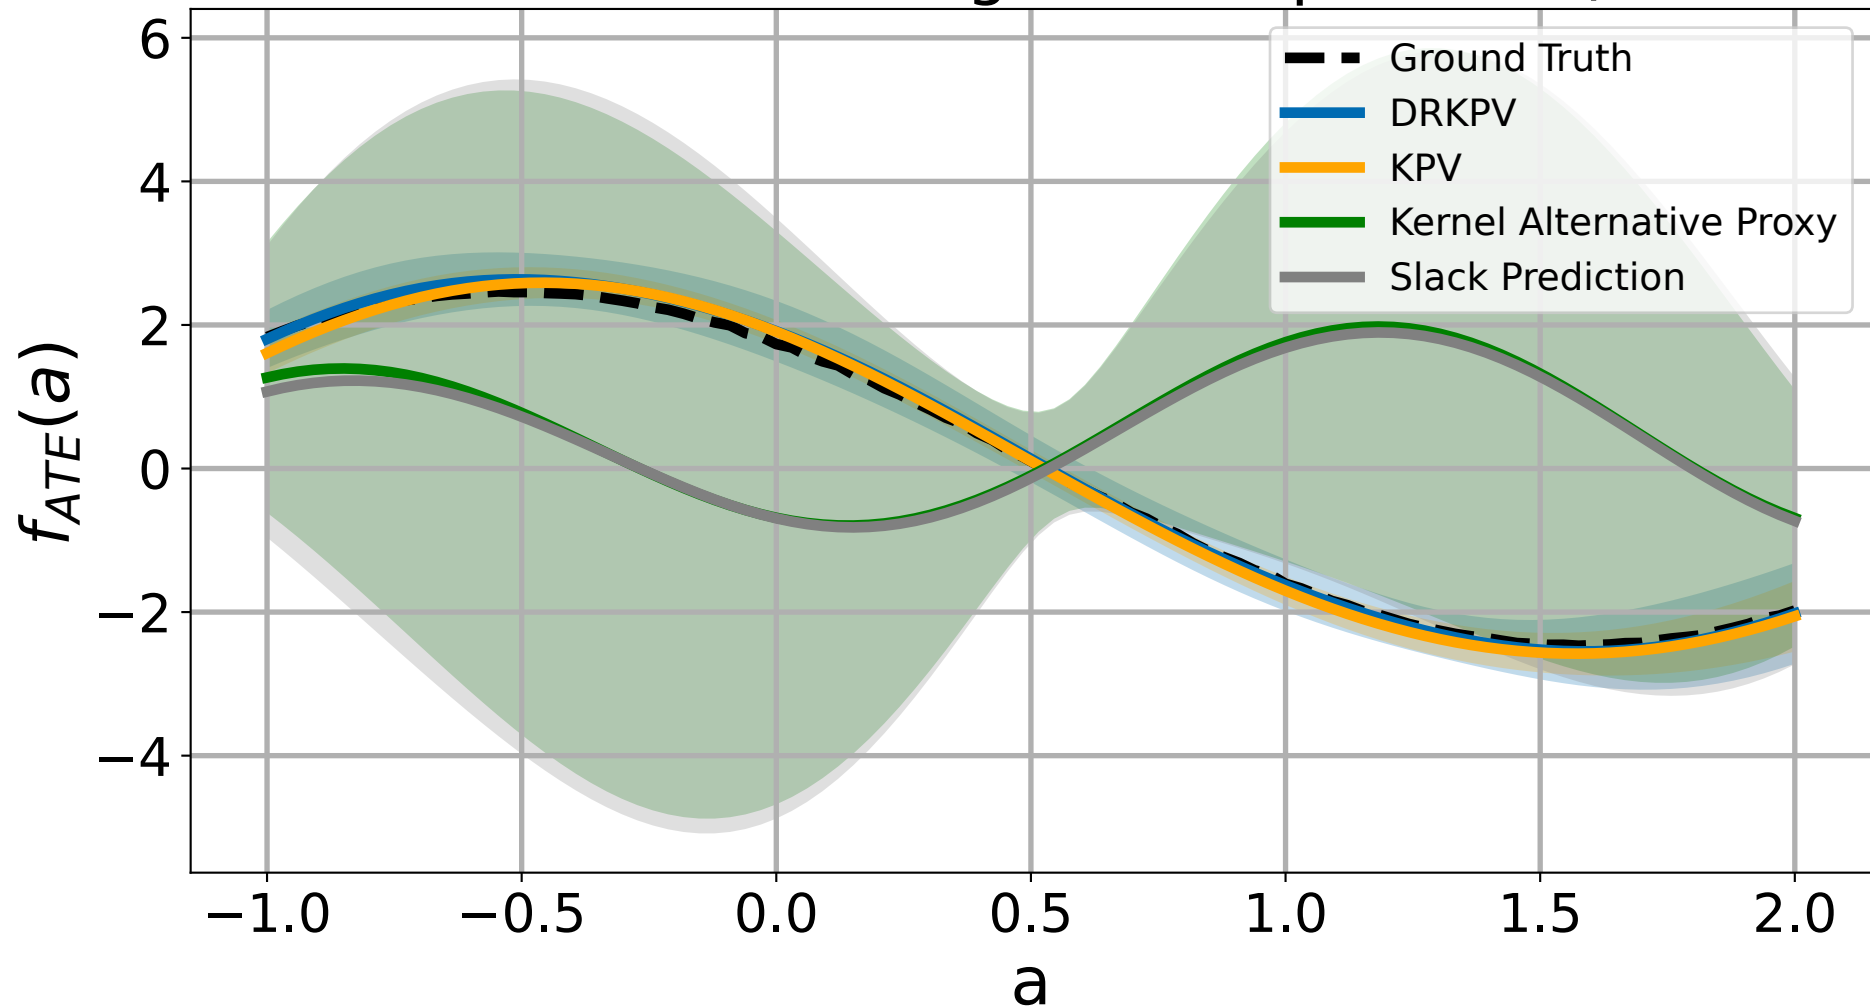

Supplement: supplementary_material [file DRKPV_ATE_TreatmentBridge_Misspecified_V2.pdf › DoublyRobustKernelProxy_Supplementary/Codes/Simulations/AnalyzeSimulationResults/Figures/DRKPV_ATE_TreatmentBridge_Misspecified_V2.pdf]

# DRPMMR - Outcome Bridge is Misspecified ( $\sigma^2 = 0.2$ )

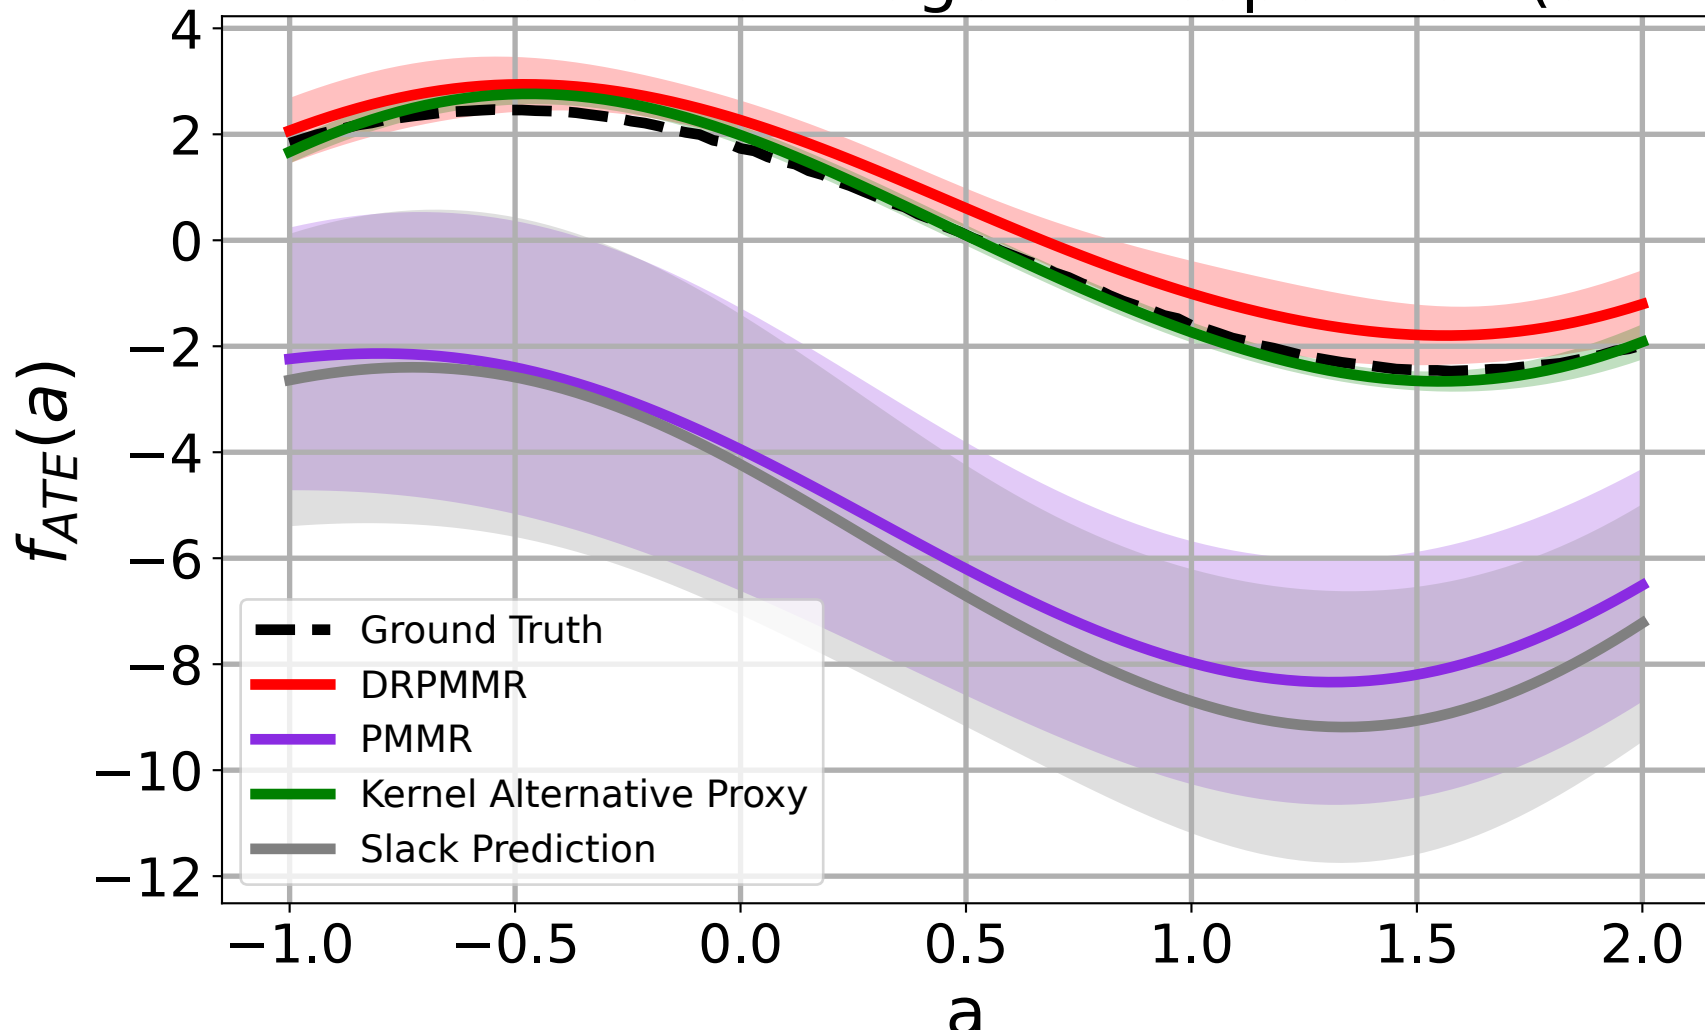

Supplement: supplementary_material [file DRPMMR_ATE_OutcomeBridge_Misspecified_V1.pdf › DoublyRobustKernelProxy_Supplementary/Codes/Simulations/AnalyzeSimulationResults/Figures/DRPMMR_ATE_OutcomeBridge_Misspecified_V1.pdf]

# DRPMMR - Outcome Bridge is Misspecified ( $\sigma^2 = 0.5$ )

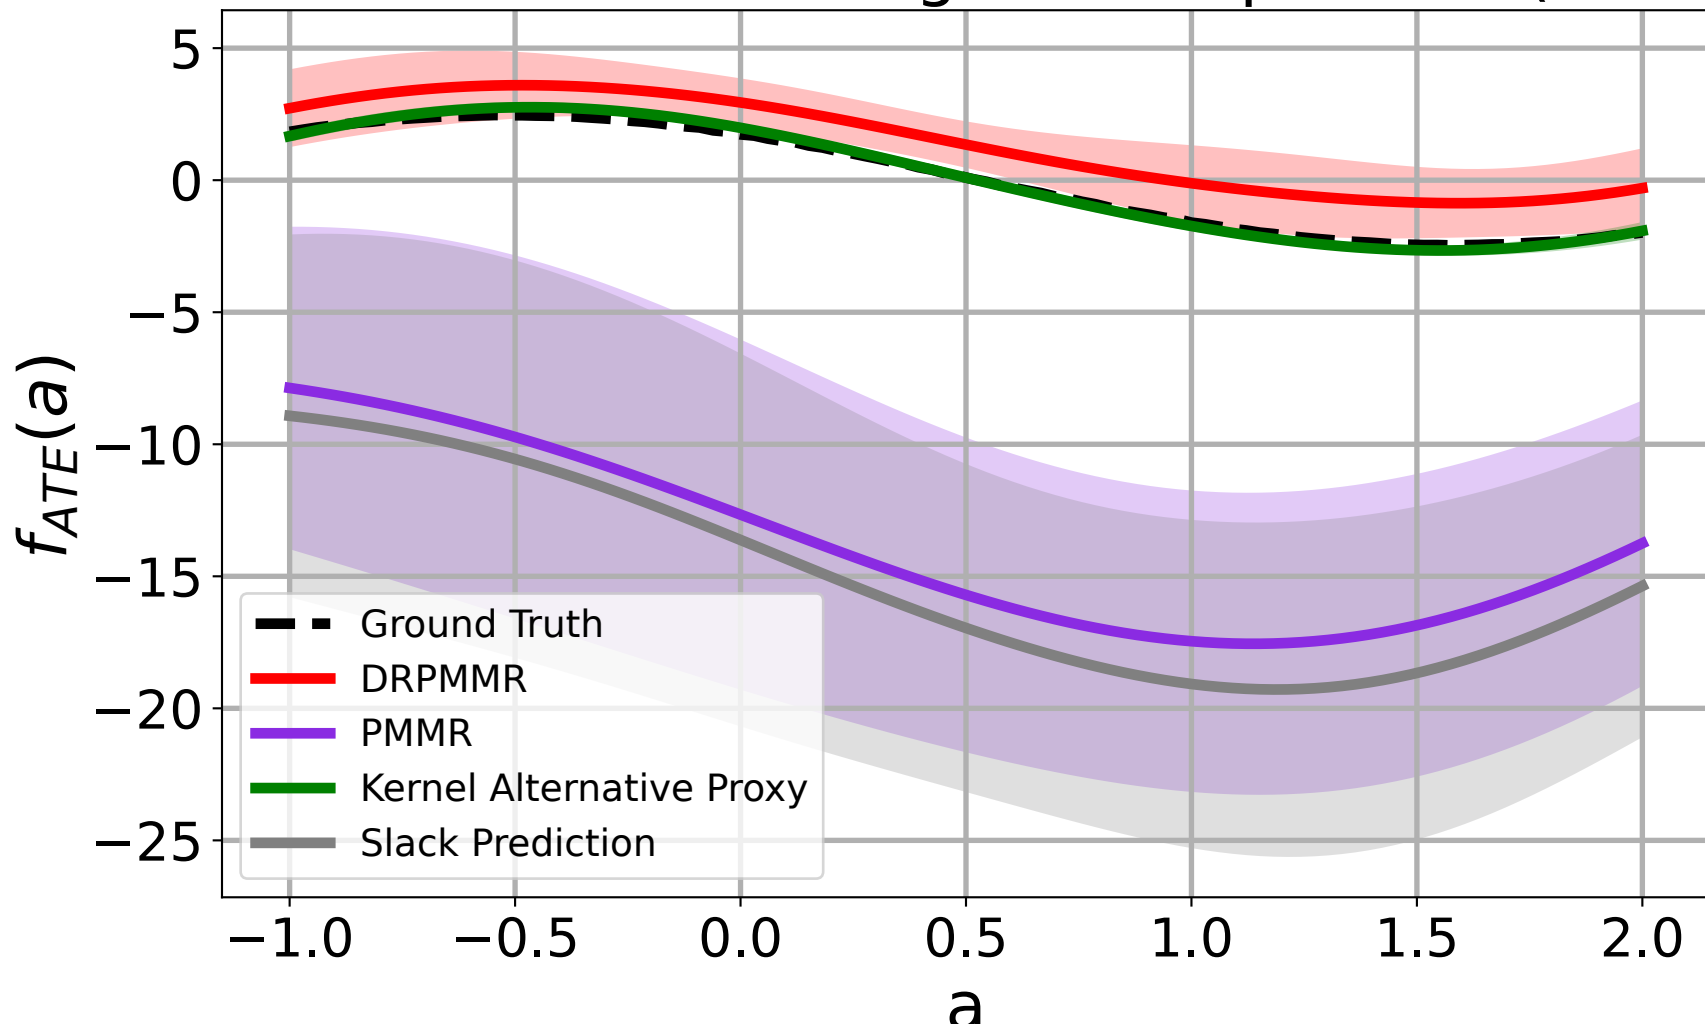

Supplement: supplementary_material [file DRPMMR_ATE_OutcomeBridge_Misspecified_V2.pdf › DoublyRobustKernelProxy_Supplementary/Codes/Simulations/AnalyzeSimulationResults/Figures/DRPMMR_ATE_OutcomeBridge_Misspecified_V2.pdf]

# DRPMMR - Treatment Bridge is Misspecified ( $\sigma^2 = 0.2$ )

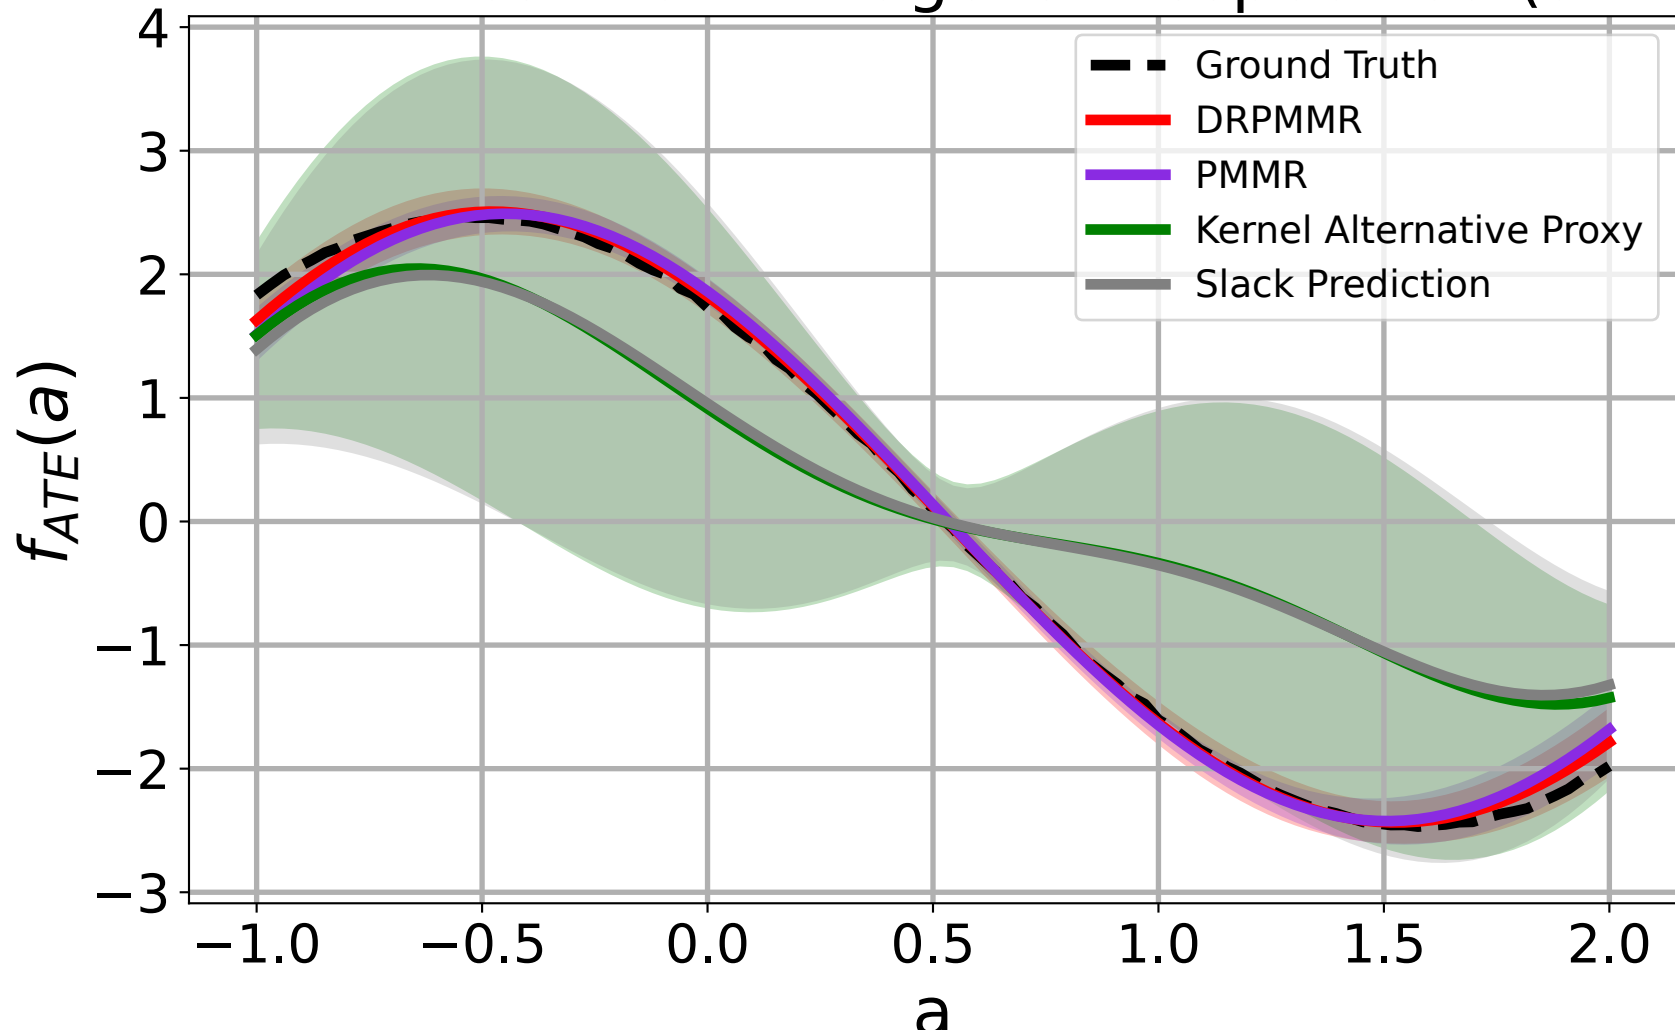

Supplement: supplementary_material [file DRPMMR_ATE_TreatmentBridge_Misspecified_V1.pdf › DoublyRobustKernelProxy_Supplementary/Codes/Simulations/AnalyzeSimulationResults/Figures/DRPMMR_ATE_TreatmentBridge_Misspecified_V1.pdf]

# DRPMMR - Treatment Bridge is Misspecified ( $\sigma^2 = 0.5$ )

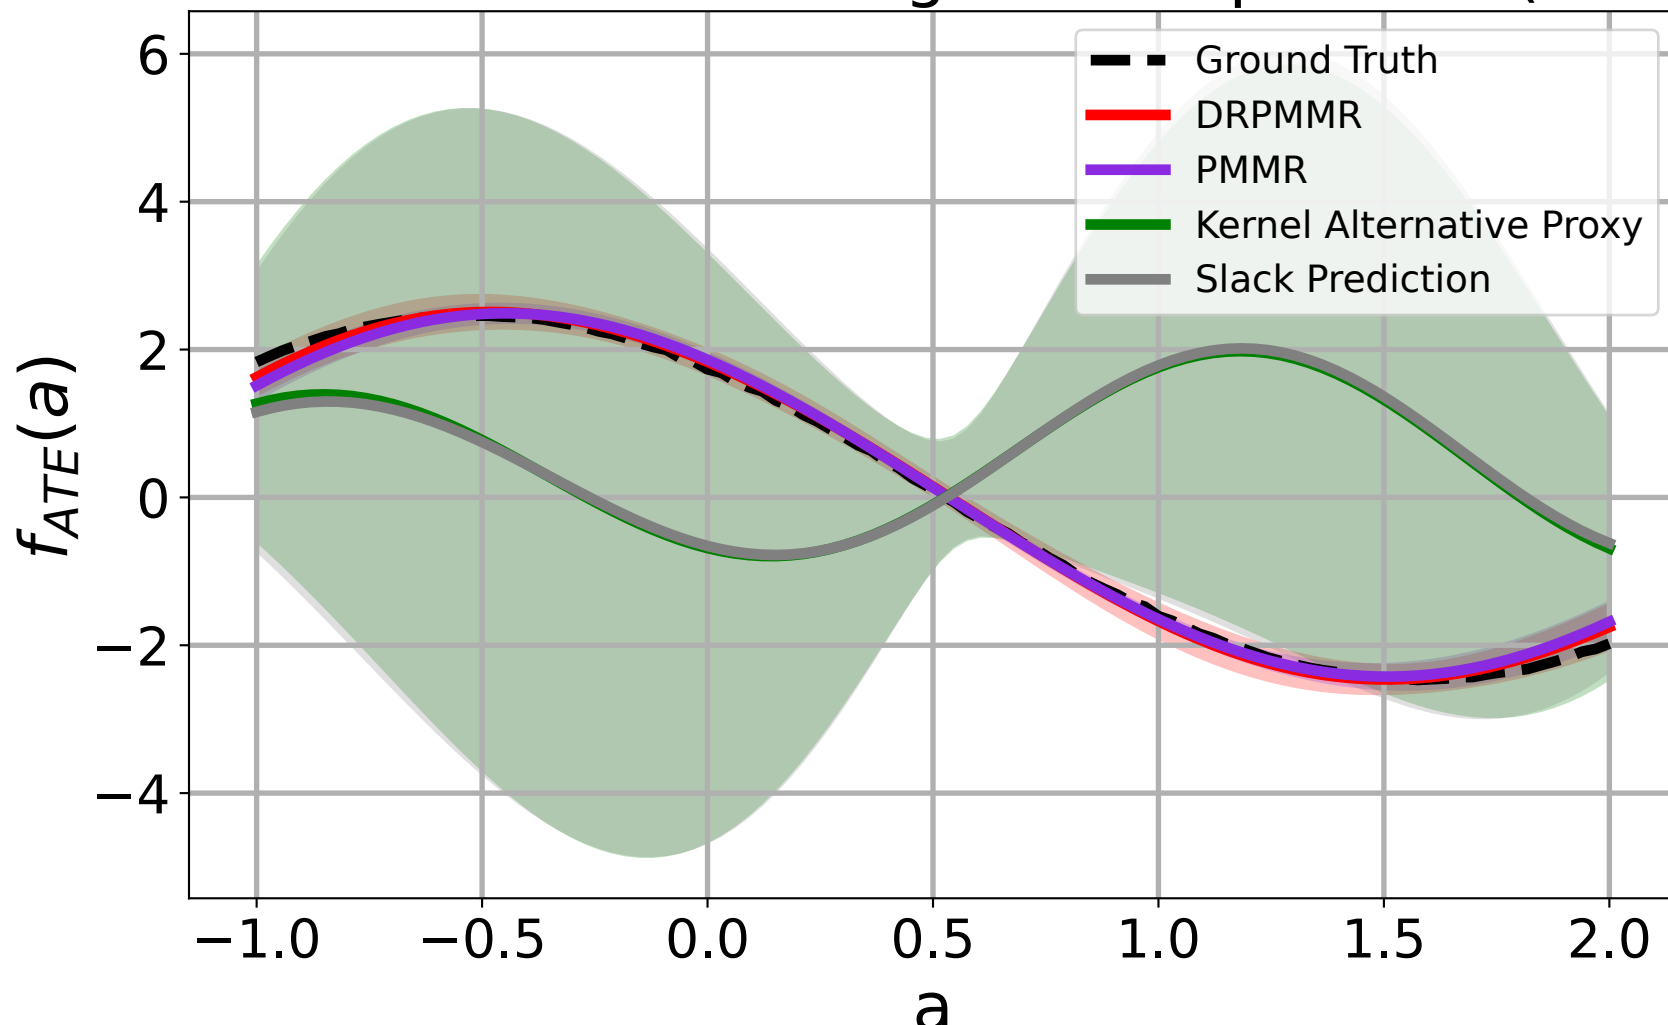

Supplement: supplementary_material [file DRPMMR_ATE_TreatmentBridge_Misspecified_V2.pdf › DoublyRobustKernelProxy_Supplementary/Codes/Simulations/AnalyzeSimulationResults/Figures/DRPMMR_ATE_TreatmentBridge_Misspecified_V2.pdf]

# Grade Retention Experiments - IR and IM

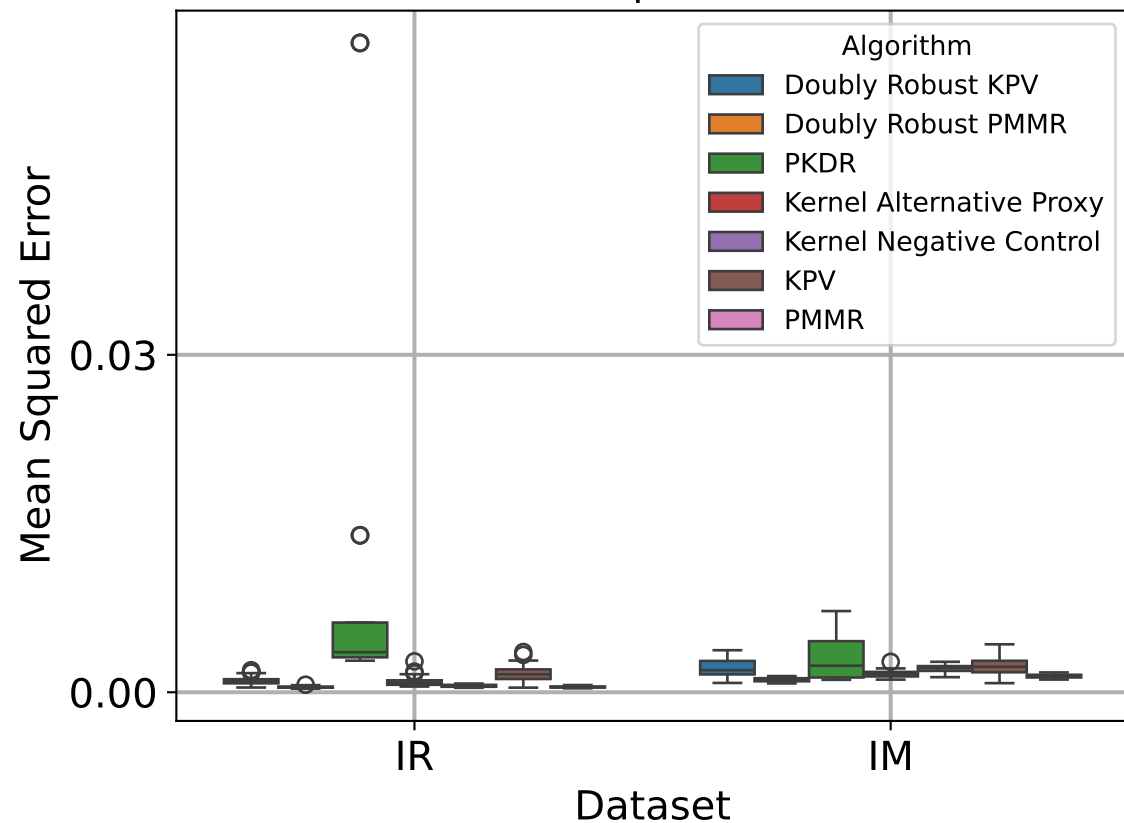

Supplement: supplementary_material [file DoublyRobustKPV_ATE_Deaner_Comparison.pdf › DoublyRobustKernelProxy_Supplementary/Codes/Simulations/AnalyzeSimulationResults/Figures/DoublyRobustKPV_ATE_Deaner_Comparison.pdf]

# Legalized Abortion and Crime Data Experiment

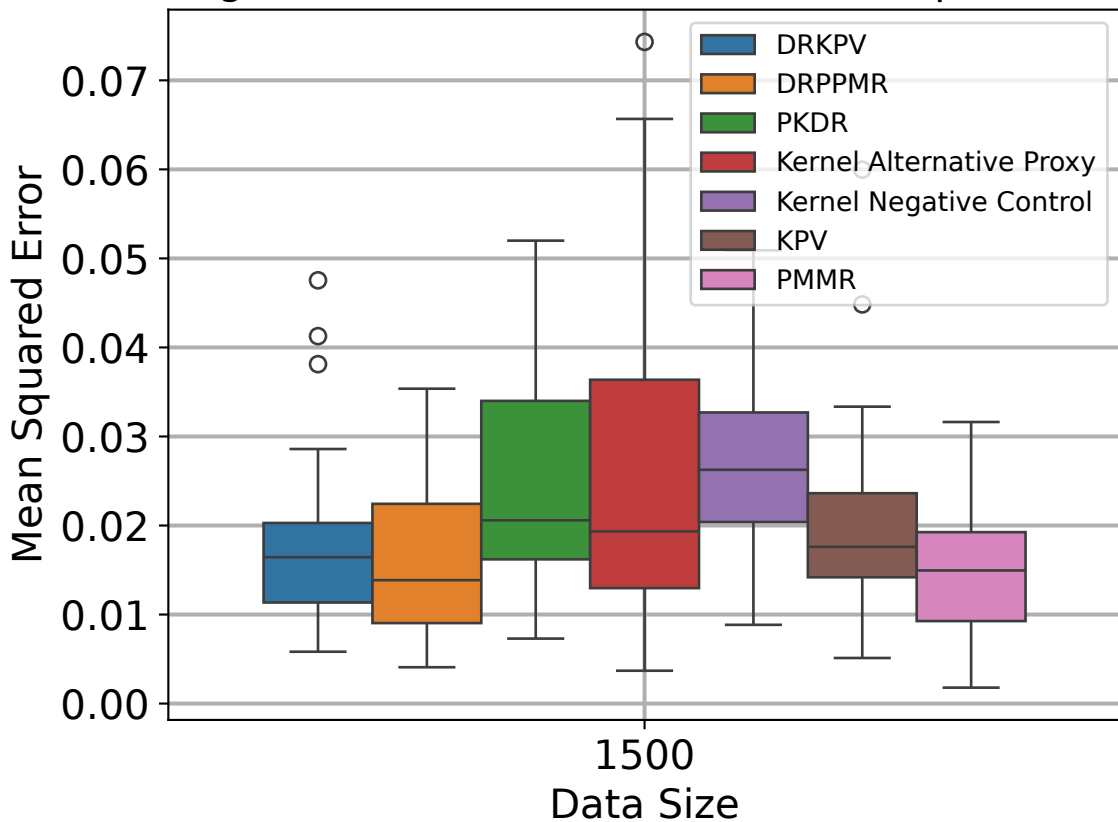

Supplement: supplementary_material [file DoublyRobustKPV_Abortion&Crime_Comparison.pdf › DoublyRobustKernelProxy_Supplementary/Codes/Simulations/AnalyzeSimulationResults/Figures/DoublyRobustKPV_Abortion&Crime_Comparison.pdf]

# ATE Predictions - Setting 1

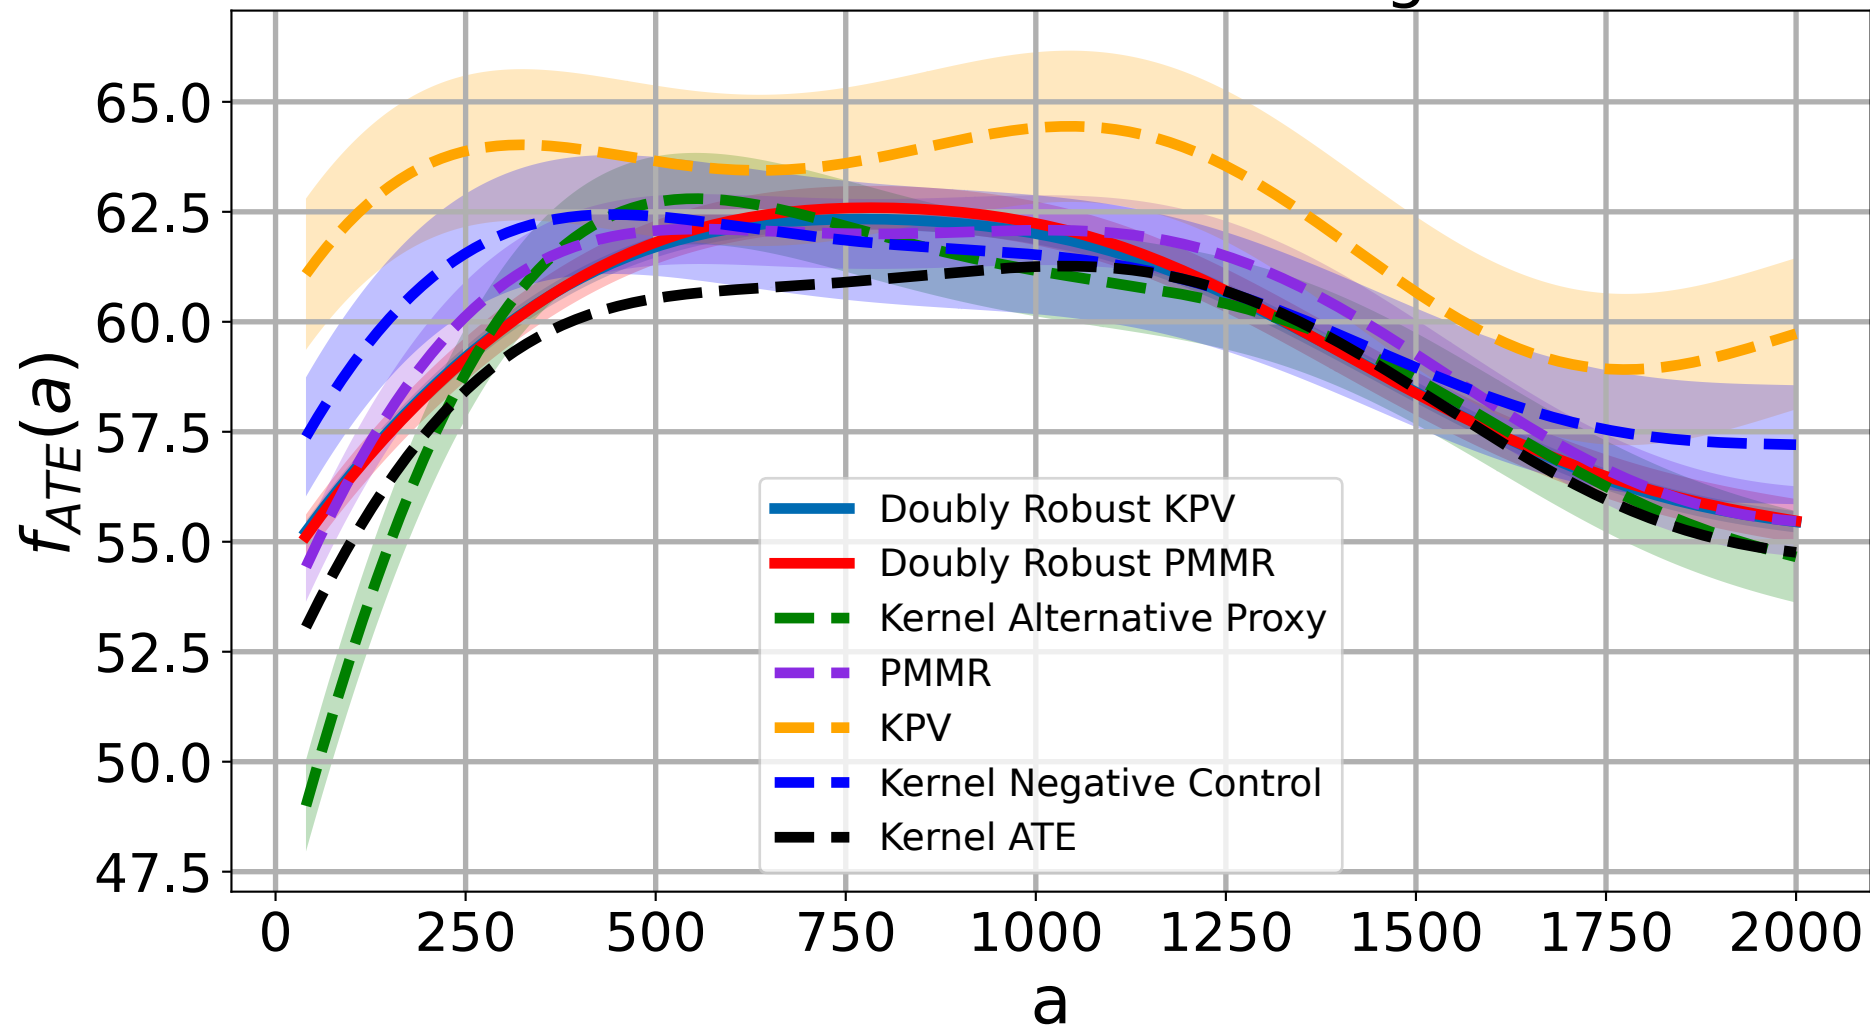

Supplement: supplementary_material [file DoublyRobustKPV_JobCorps_Comparison__Misspecified_Setting1.1.pdf › DoublyRobustKernelProxy_Supplementary/Codes/Simulations/AnalyzeSimulationResults/Figures/DoublyRobustKPV_JobCorps_Comparison__Misspecified_Setting1.1.pdf]

# ATE Predictions - Setting 2

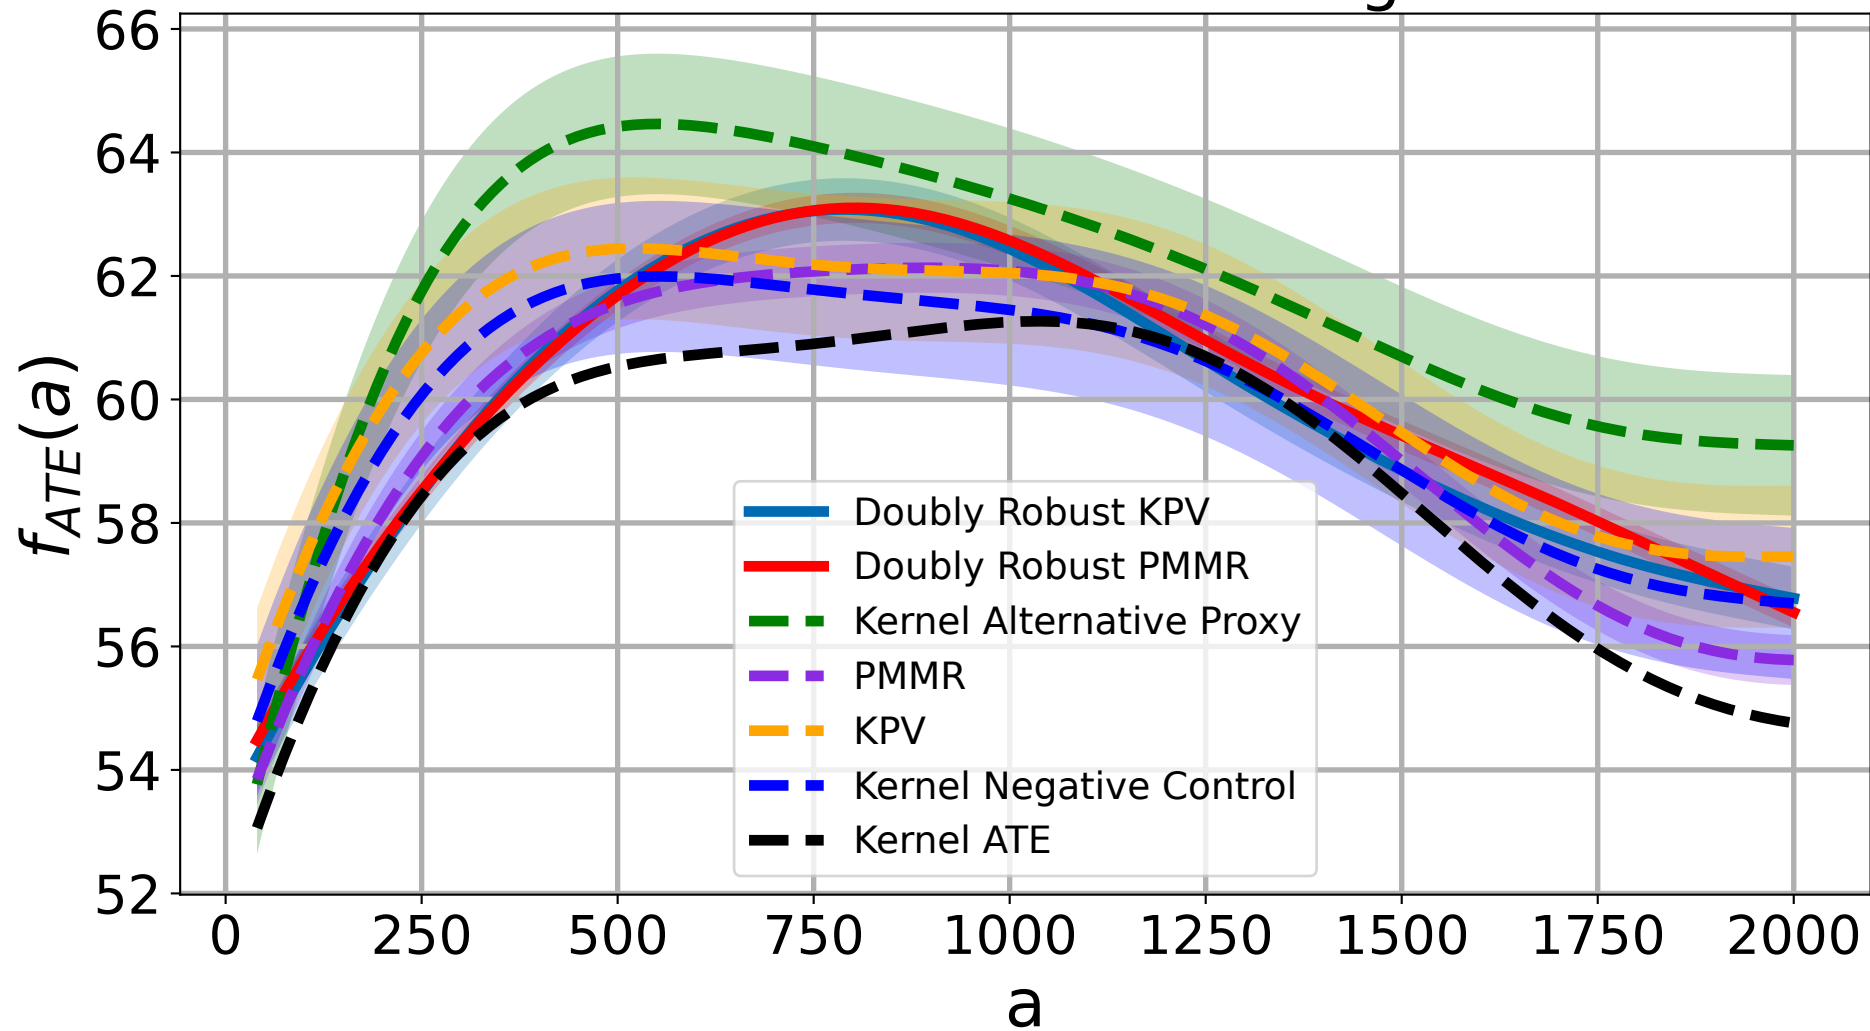

Supplement: supplementary_material [file DoublyRobustKPV_JobCorps_Comparison__Misspecified_Setting1.2.pdf › DoublyRobustKernelProxy_Supplementary/Codes/Simulations/AnalyzeSimulationResults/Figures/DoublyRobustKPV_JobCorps_Comparison__Misspecified_Setting1.2.pdf]

# ATE Predictions - Setting 3

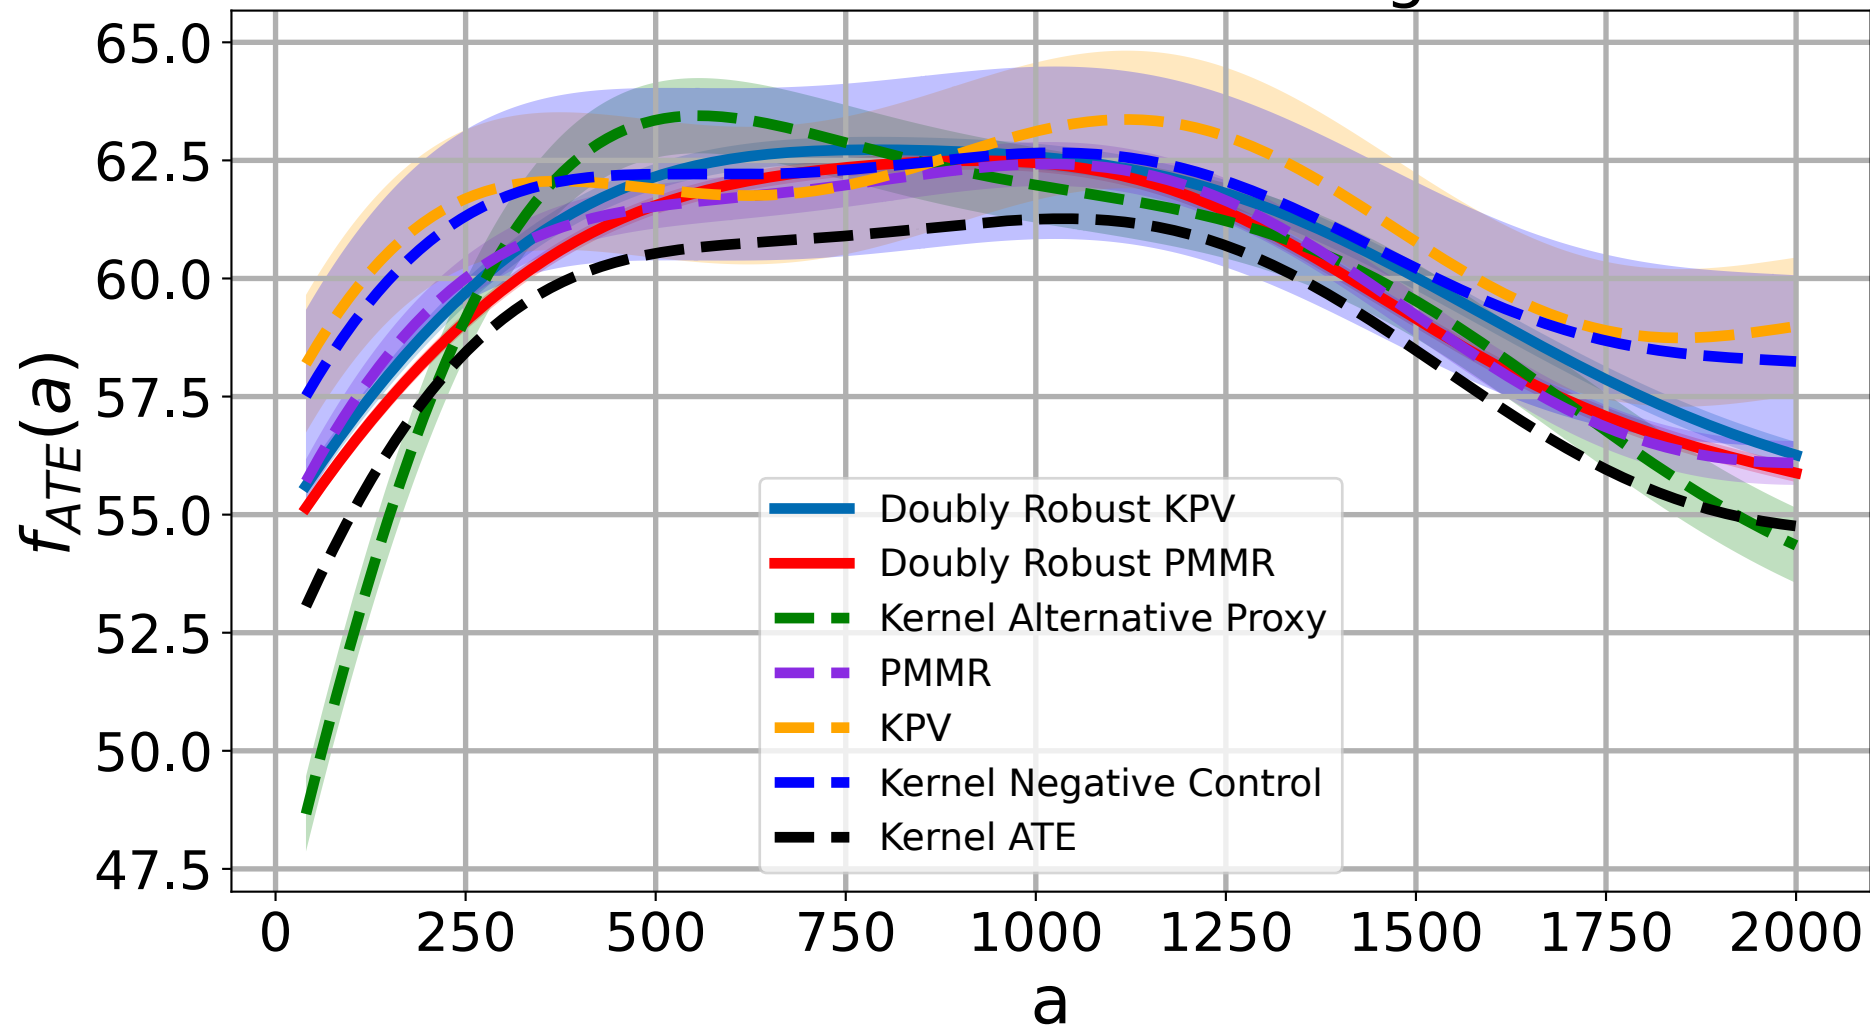

Supplement: supplementary_material [file DoublyRobustKPV_JobCorps_Comparison__Misspecified_Setting2.1.pdf › DoublyRobustKernelProxy_Supplementary/Codes/Simulations/AnalyzeSimulationResults/Figures/DoublyRobustKPV_JobCorps_Comparison__Misspecified_Setting2.1.pdf]

# ATE Predictions - Setting 4

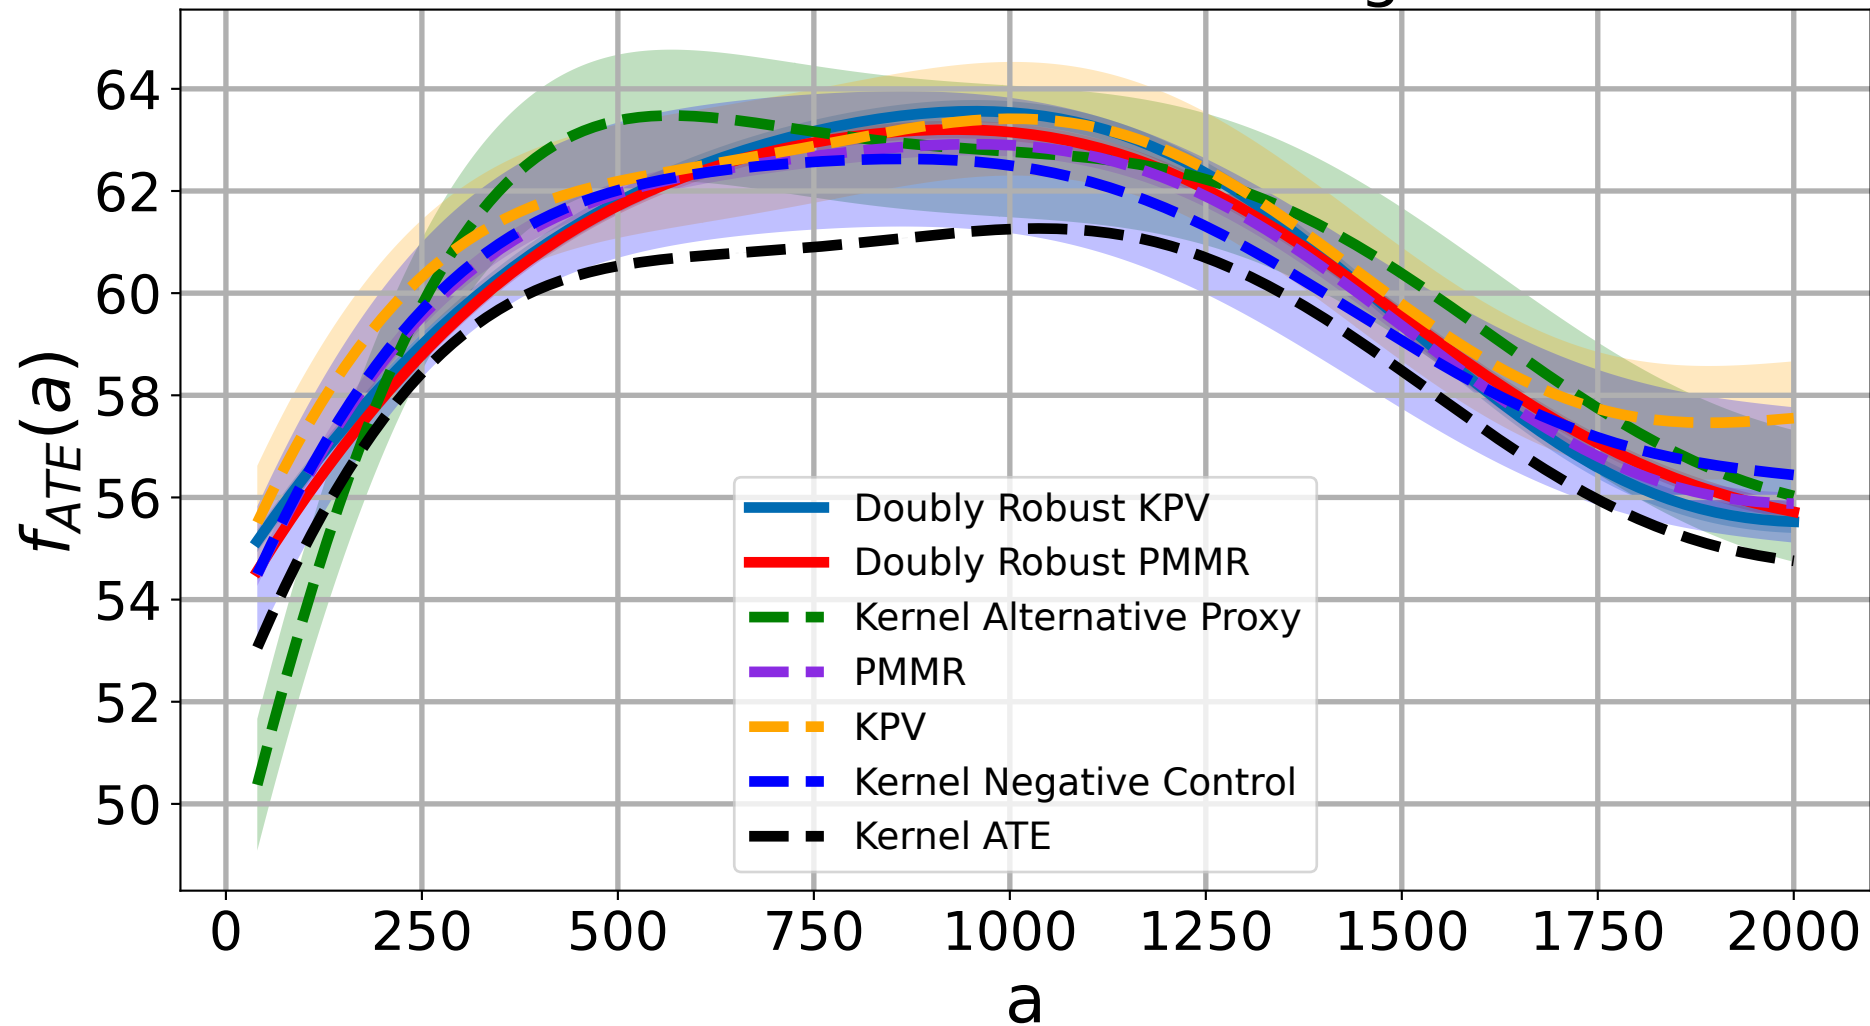

Supplement: supplementary_material [file DoublyRobustKPV_JobCorps_Comparison__Misspecified_Setting2.2.pdf › DoublyRobustKernelProxy_Supplementary/Codes/Simulations/AnalyzeSimulationResults/Figures/DoublyRobustKPV_JobCorps_Comparison__Misspecified_Setting2.2.pdf]

# ATE Predictions - Setting 5

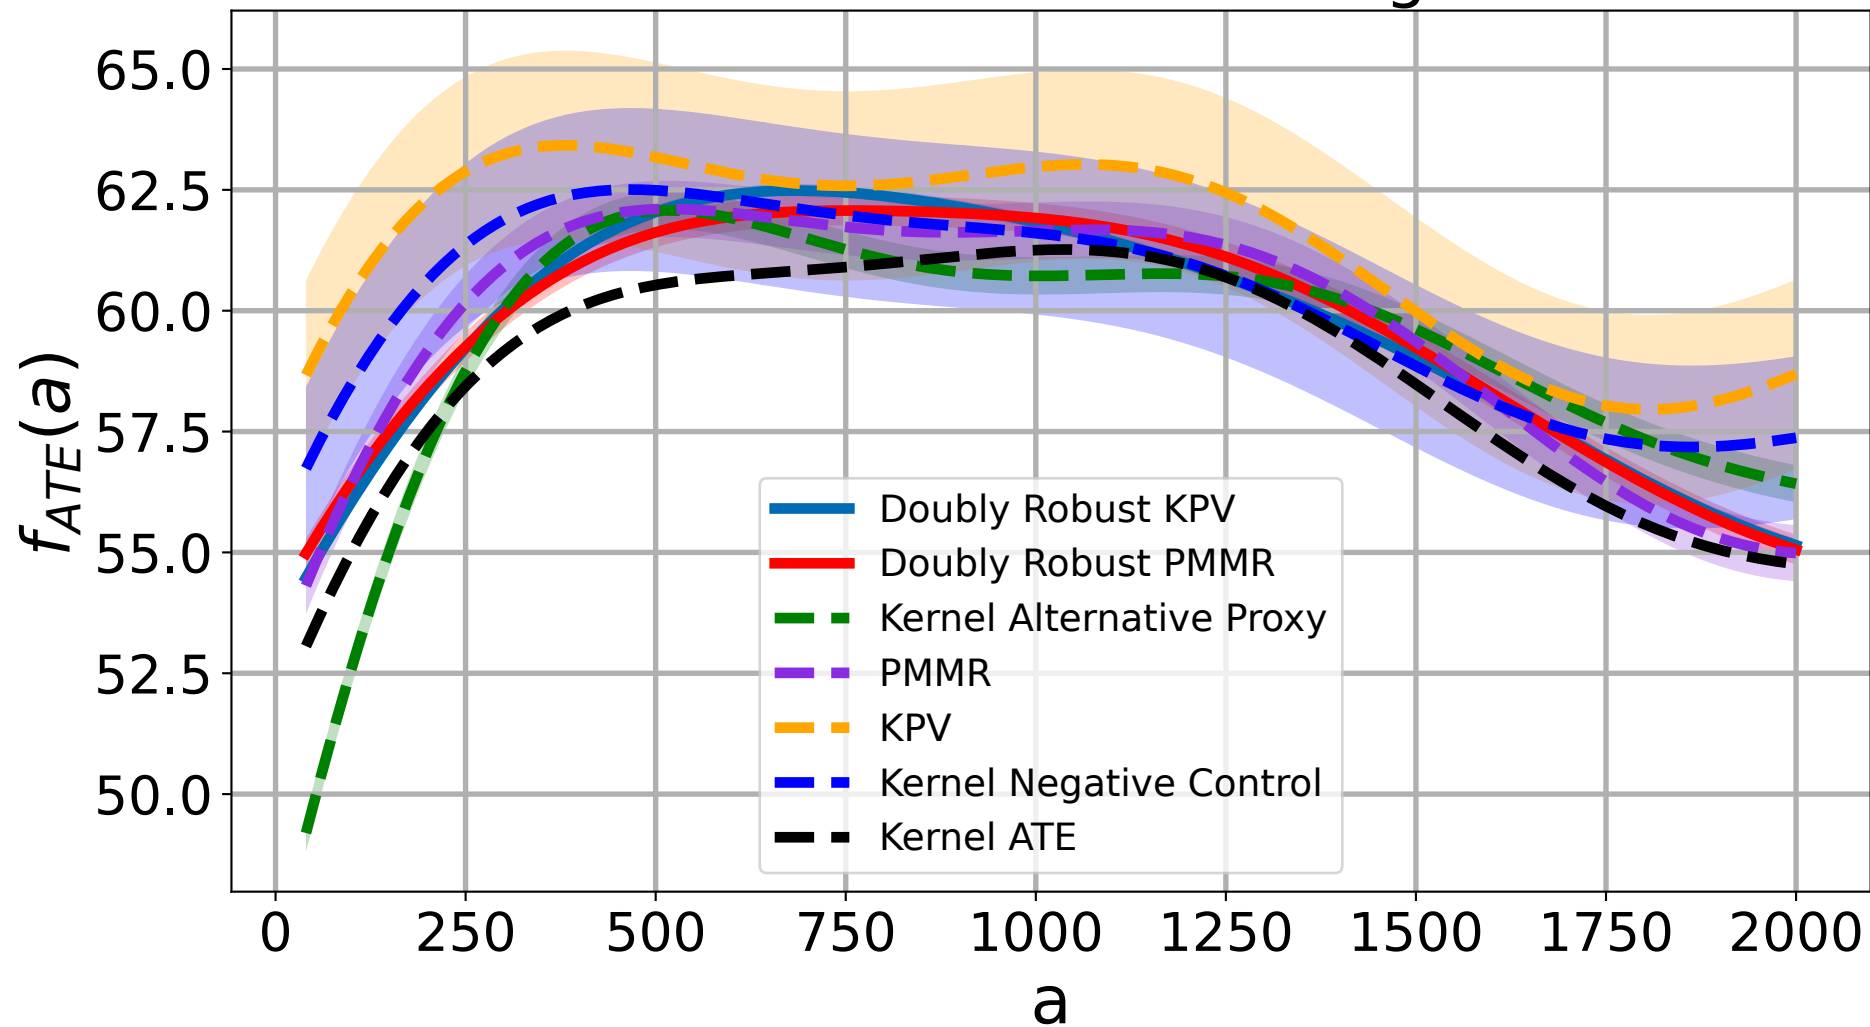

Supplement: supplementary_material [file DoublyRobustKPV_JobCorps_Comparison__Misspecified_Setting3.1.pdf › DoublyRobustKernelProxy_Supplementary/Codes/Simulations/AnalyzeSimulationResults/Figures/DoublyRobustKPV_JobCorps_Comparison__Misspecified_Setting3.1.pdf]

# ATE Predictions - Setting 6

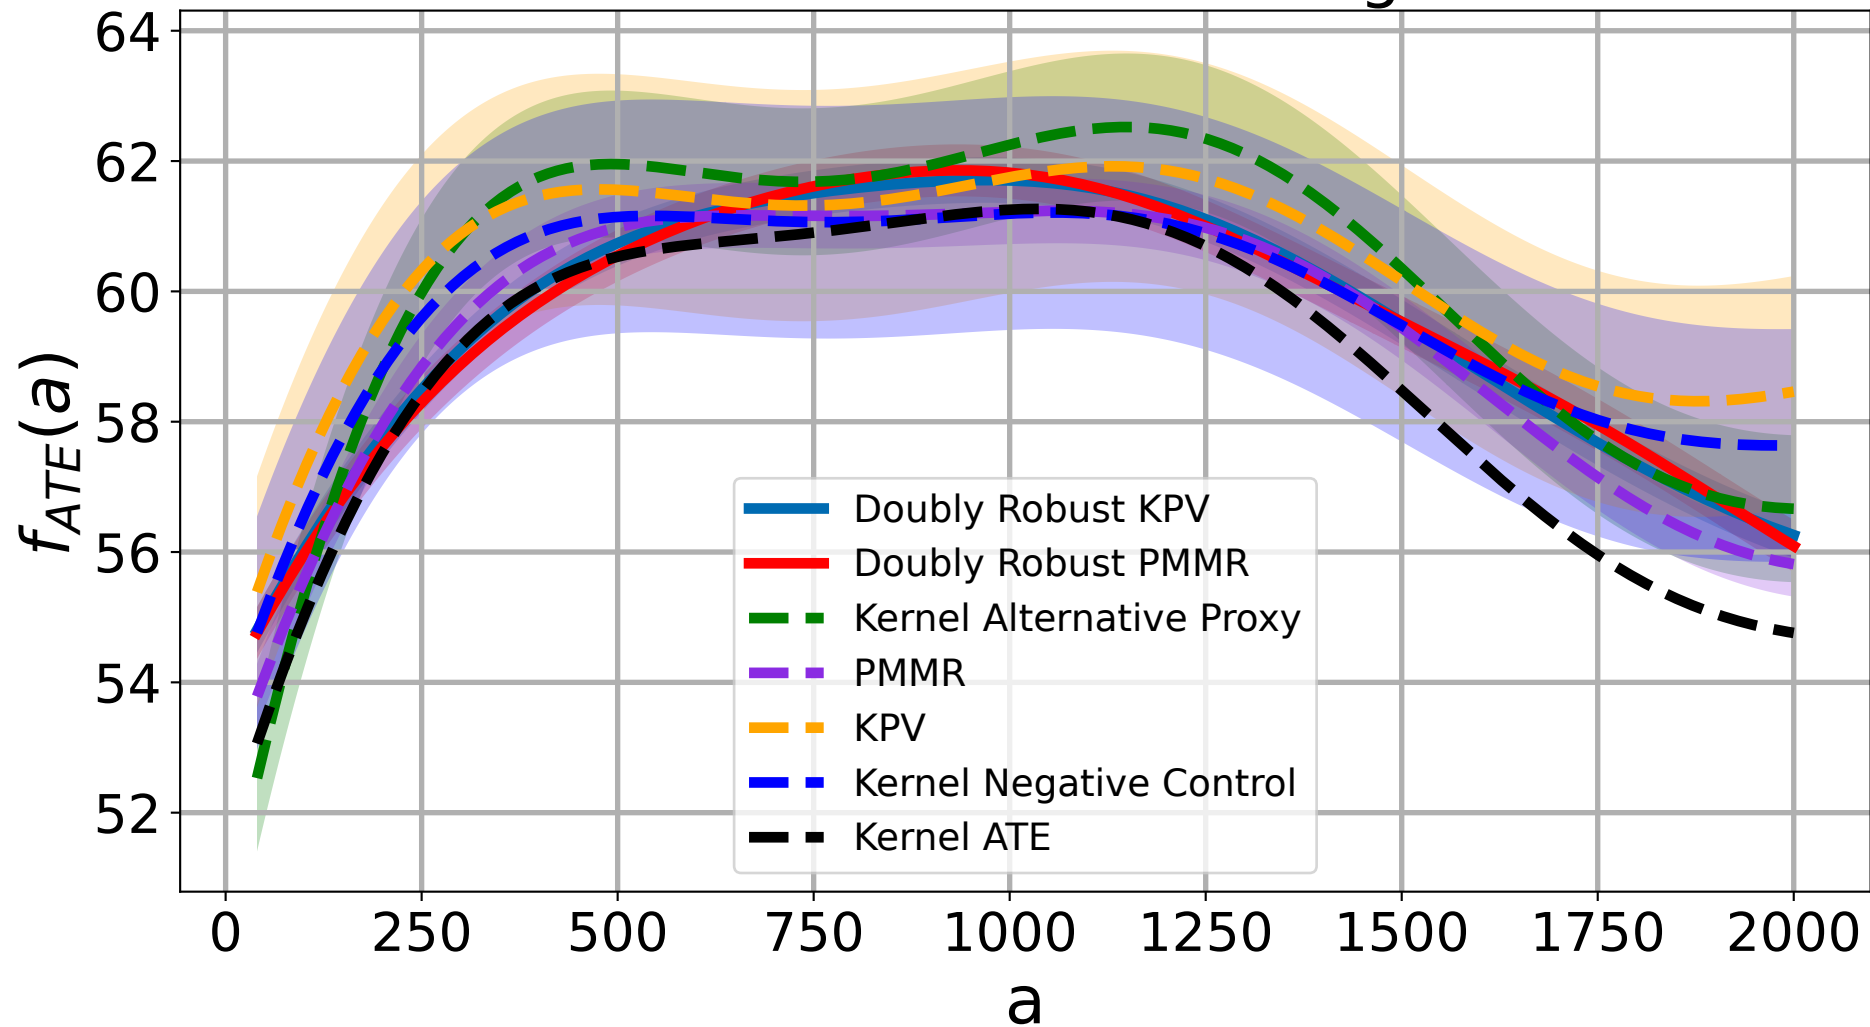

Supplement: supplementary_material [file DoublyRobustKPV_JobCorps_Comparison__Misspecified_Setting3.2.pdf › DoublyRobustKernelProxy_Supplementary/Codes/Simulations/AnalyzeSimulationResults/Figures/DoublyRobustKPV_JobCorps_Comparison__Misspecified_Setting3.2.pdf]

# Synthetic Low Dimensional Data Experiment

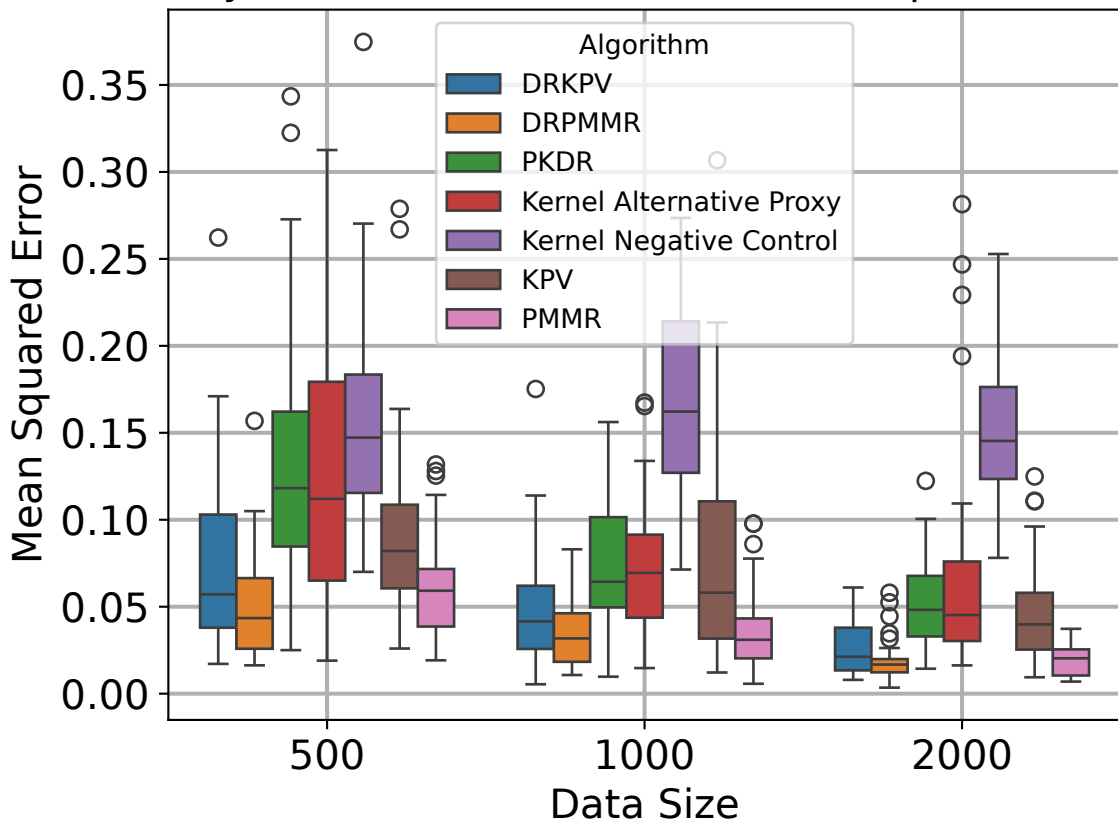

Supplement: supplementary_material [file DoublyRobustKPV_SyntheticLowDimResults.pdf › DoublyRobustKernelProxy_Supplementary/Codes/Simulations/AnalyzeSimulationResults/Figures/DoublyRobustKPV_SyntheticLowDimResults.pdf]

# dSprite Experiment

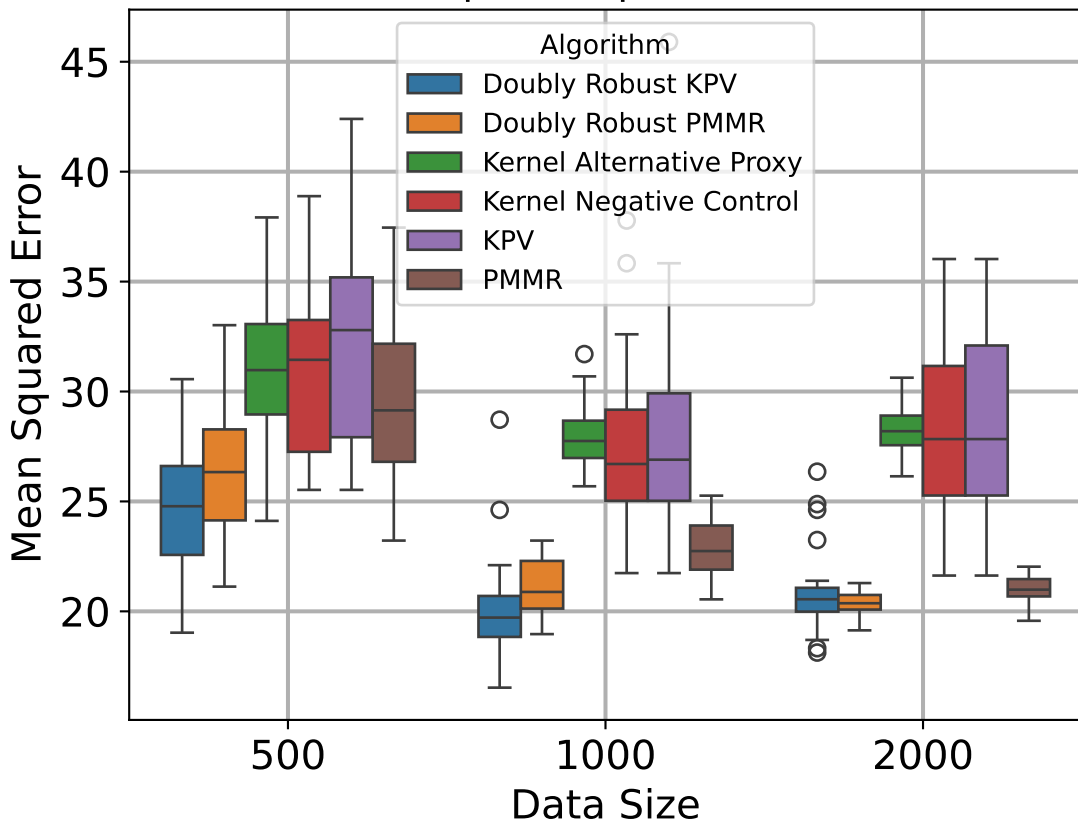

Supplement: supplementary_material [file DoublyRobustKPV_dSprite_Comparison.pdf › DoublyRobustKernelProxy_Supplementary/Codes/Simulations/AnalyzeSimulationResults/Figures/DoublyRobustKPV_dSprite_Comparison.pdf]
